# Supplementary material for: Pervaporation and Gas Separation Properties of High-Molecular Ladder-like Polyphenylsilsesquioxanes
Source: MDPI journal article supplement (doi:10.3390/polym15153277), 2023-08-02
Supplement: s1 [file s1]

## **Supplementary information**

### **Pervaporation and gas separation properties of high-molecular ladder-like polyphenylsilsesquioxanes**

**Tatiana S. Anokhina, Tatyana O. Ershova, Anton A. Anisimov, Maxim N. Temnikov, Evgenia A. Grushevenko, Ilya L. Borisov, Alexey V. Volkov and Aziz M. Muzafarov**

#### **Table of contents**

|                                              |   |
|----------------------------------------------|---|
| 1. GPC of L-PPSQ .....                       | 2 |
| 2. TGA analysis.....                         | 3 |
| 3. Mechanical characteristics of L-PPSQ..... | 4 |

## 1. GPC of ladder-like polyphenylsilsesquioxanes (L-PPSQ)

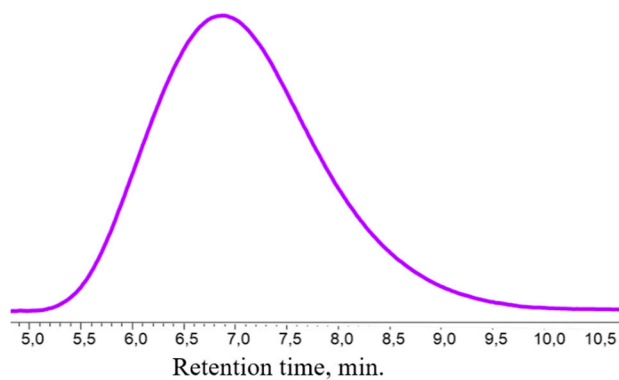

**Figure S1.** GPC curve of L-PPSQ.

**Table S1**

Molecular weight characteristics of L-PPSQ

| Sample | Monomer<br>concentration, wt% | Temperature,<br>°C | Reaction<br>time, h | Mp,<br>kDa | Mw,<br>kDa | Mn,<br>kDa | PDI |
|--------|-------------------------------|--------------------|---------------------|------------|------------|------------|-----|
| L-PPSQ | 20                            | 150                | 4                   | 577,9      | 540,4      | 238,1      | 2,3 |

## 2. TGA analysis of L-PPSQ

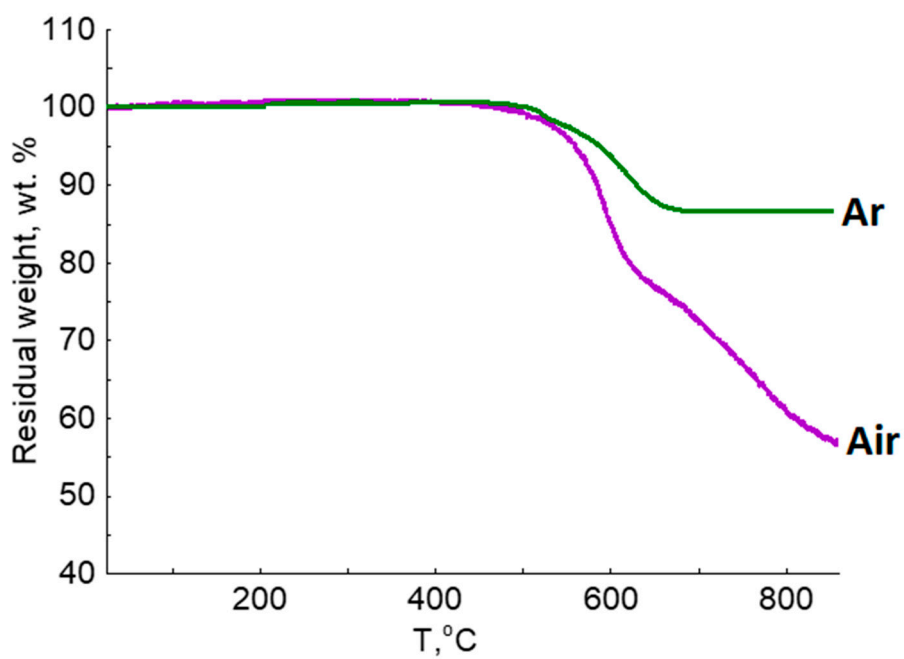

**Figure S2.** TGA curves of L-PPSQ obtained at a heating rate of 10 degrees/min in air and in argon.

### 3. Mechanical characteristics of L-PPSQ

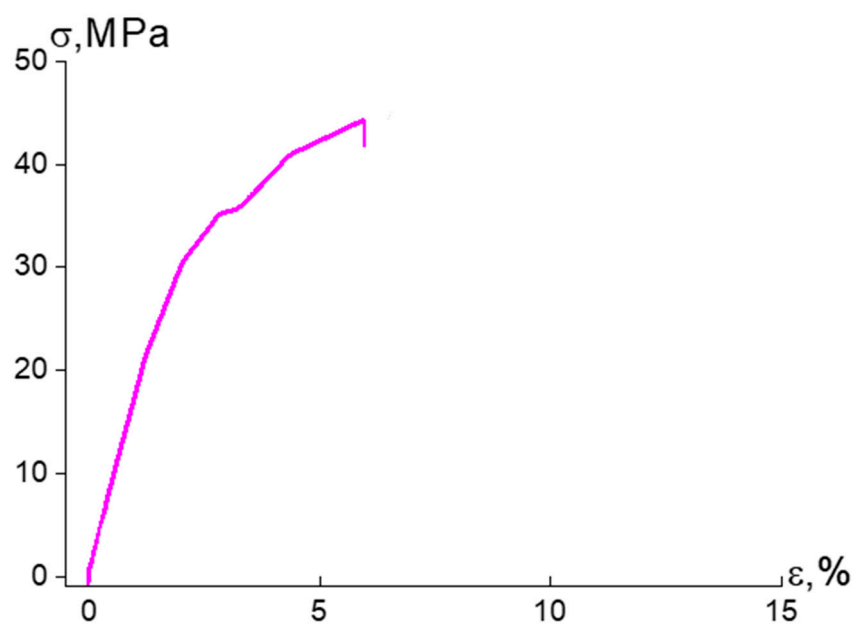

**Figure S3.** Stretching curve of L-PPSQ
